# Supplementary material
Source: PubMed Central journal article supplement (PMC4216764)
Supplement: NIHMS624932-supplement-2.pdf [file NIHMS624932-supplement-2.pdf]

**Figure S1. Differential apoptosis in CD62L<sup>lo</sup> and CD62L<sup>hi</sup> CD8<sup>+</sup> T cells.** (A) PBMCs were stimulated and left either untreated or re-stimulated for 4 hours with anti-CD3, PHA, H<sub>2</sub>O<sub>2</sub>, or staurosporine. Cultures were stained with anti-CD8, anti-CD62L, Annexin-V, and DiOC<sub>6</sub>, and flow cytometry was performed. (B) Cells were gated on CD8 and analyzed for CD62L expression. Gate frequencies are displayed. Cells were analyzed for (C) Expressions of Annexin V, and (D) DiOC<sub>6</sub> on CD62L<sup>lo</sup> and CD62L<sup>hi</sup> CD8<sup>+</sup> T cells. Experiment was repeated twice with similar results. (E) CD62L<sup>lo</sup> and CD62L<sup>hi</sup> CD8<sup>+</sup> T cells were sorted by flow cytometry. Total RNA was isolated and mRNA expression levels of the anti-apoptotic molecule BCL-XL were assessed by RT-PCR. GAPDH was used as the control. PCR products were analyzed quantitatively using the Image-J software. BCL-XL band intensities were normalized to those of GAPDH. Similar results were obtained from two different experiments. (F) Human PBMCs were stimulated with anti-CD3 and IL-15 for seven days and re-stimulated for four hours with PHA. Cells were gated on CD8<sup>+</sup>CD62L<sup>hi</sup> or CD8<sup>+</sup>CD62L<sup>lo</sup> expression and compared for DHE (superoxide) and DAF (nitric oxide) in CD62L<sup>lo</sup> and CD62L<sup>hi</sup> populations. Results are representative of three experiments. (G) Gating strategy used to identify T<sub>CM</sub> or T<sub>EM</sub> subsets in human TIL1383I TCR-transduced T cells after staining with CD8, CD44, CD62L, CXCR3 and CCR7.

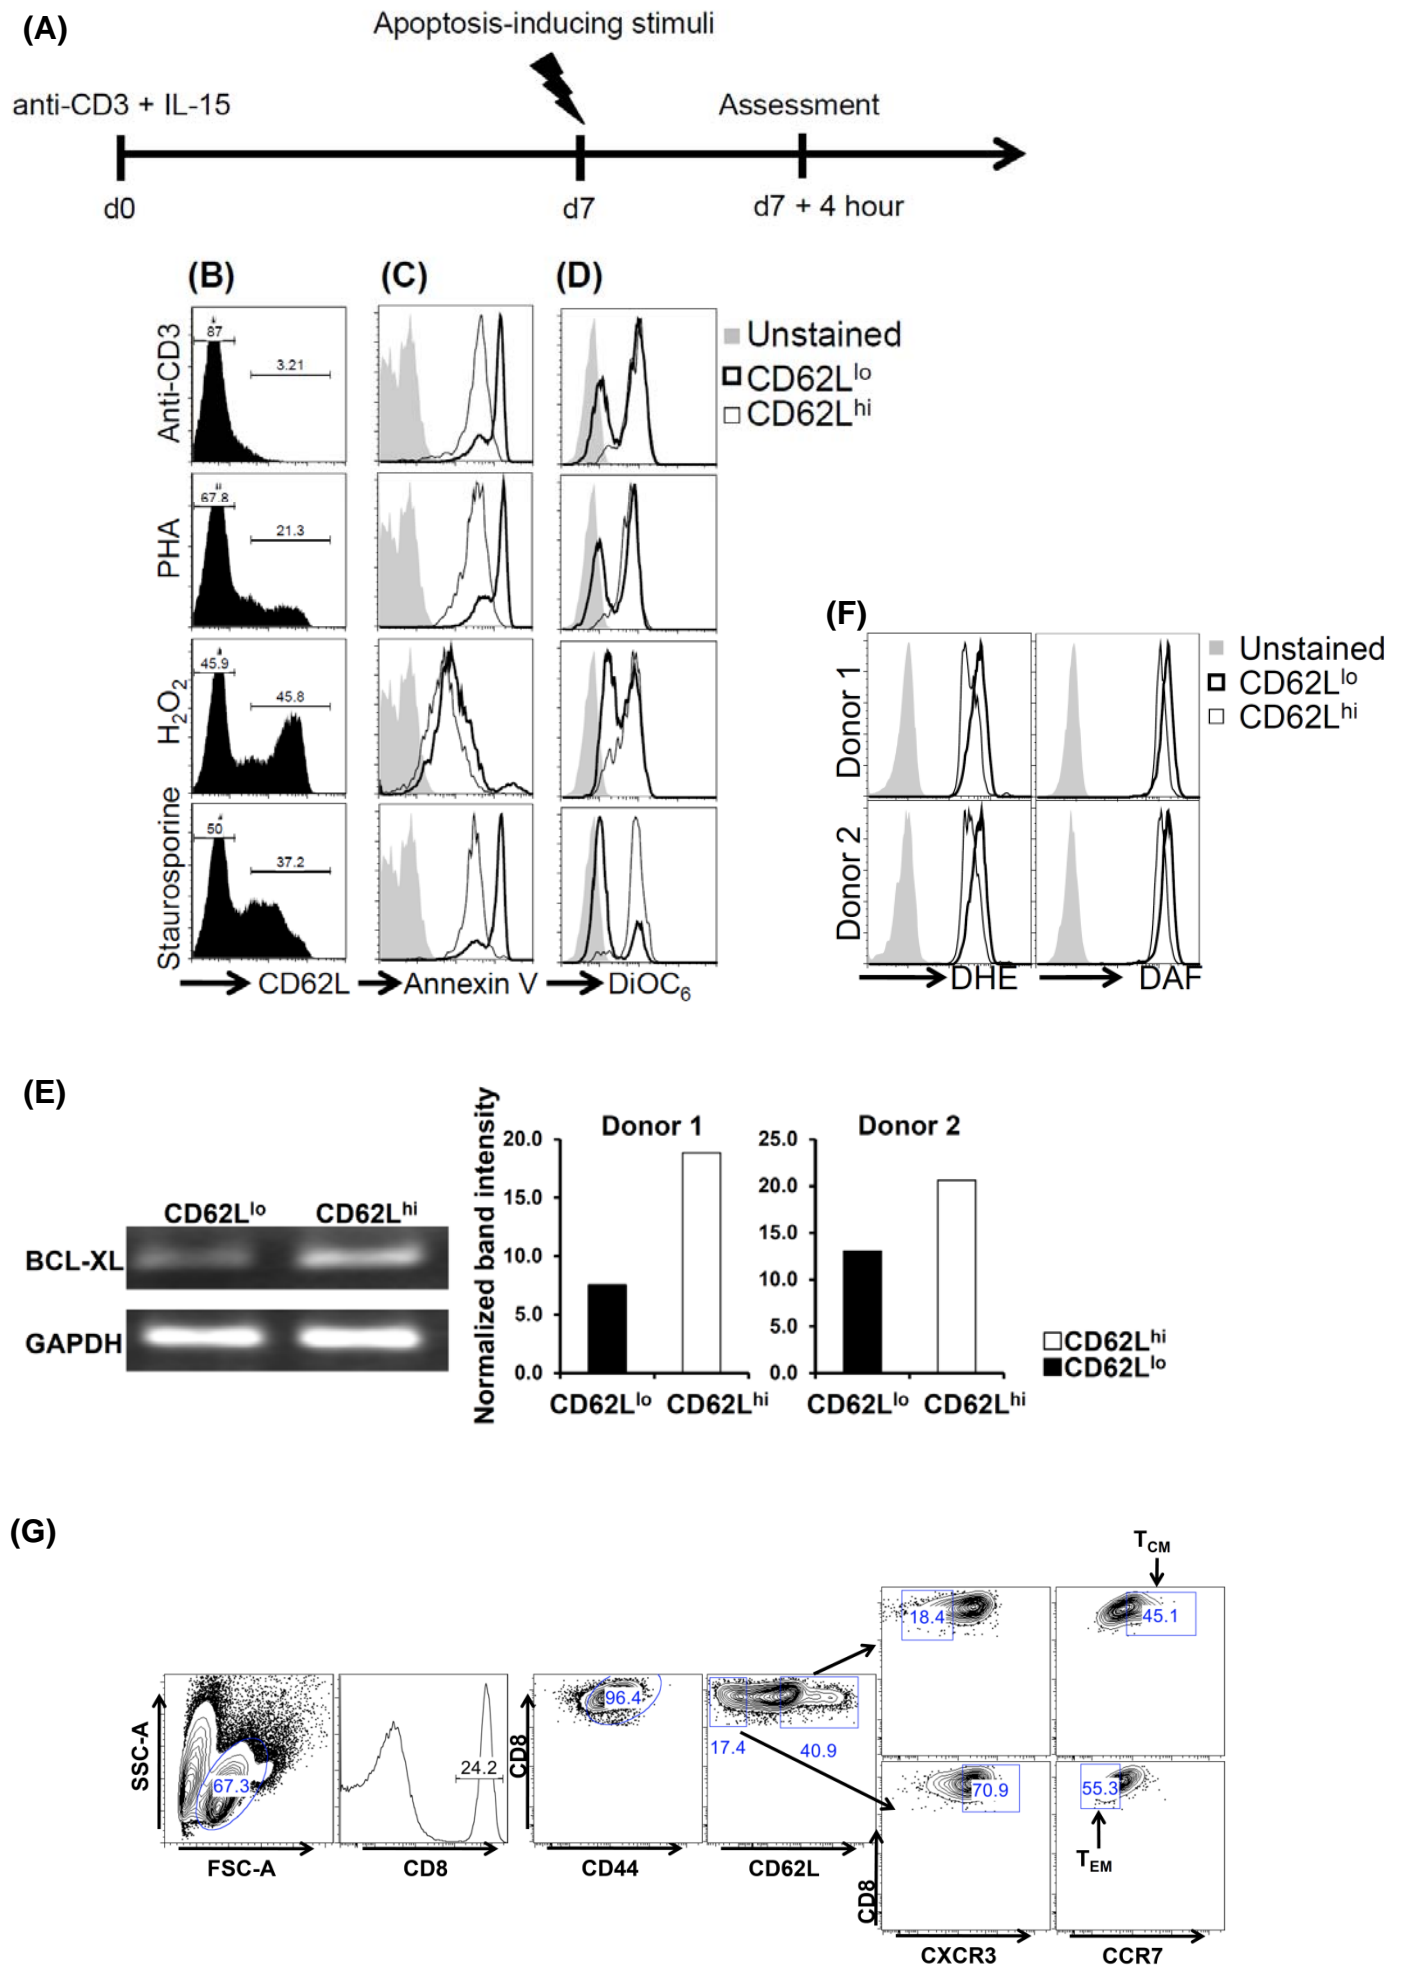

**Figure S1**
