# Supplementary material
Source: PubMed Central journal article supplement (PMC4216764)
Supplement: NIHMS624932-supplement-4.pdf [file NIHMS624932-supplement-4.pdf]

**Figure S3. Rapamycin-preconditioned CD8<sup>+</sup> T cells upregulate the levels of antioxidant molecules.** PBMCs were cultured with or without rapamycin for 5 days. **(A)** Cells were gated on CD8 and analyzed for the expression of CD62L. **(B) Upper panel:** Cells were gated on CD8 and analyzed for the expression of cell surface thiols (c-SH) using ALM-633. **Lower panel:** Cells were left untreated or re-stimulated for 4h with PHA. Cells were gated on CD8 and flow cytometric analysis of DHE (superoxide) was performed. Experiments were repeated thrice with similar results. **(C)** Cells were left untreated or treated with H<sub>2</sub>O<sub>2</sub> for 4 h in the presence or absence of rapamycin. Annexin V levels were then determined in CD62L<sup>lo</sup> and CD62L<sup>hi</sup> CD8<sup>+</sup> T cells. Result from one of the two experiments with similar results is shown. **(D)** Purified CD8<sup>+</sup> T cells were analyzed for mRNA of key antioxidant molecules (as indicated) by real-time PCR. Results are representative from one of the two similar experiments. **(E)** The c-SH levels on CD8<sup>+</sup> T cells, either untreated or pretreated with 5 mM L-NAC for 30 minutes, was determined using ALM-633 staining. **(F)** For antigen-specific pS6 expression, TIL1383I TCR-transduced CD8<sup>+</sup> T cells were co-cultured for 4 h with T2 cells that were pulsed with cognate tyrosinase or control MART-1 peptides and stained with anti-CD8, CD34, CD62L and phosphoS6 (pS6) antibodies. pS6 was evaluated on CD8<sup>+</sup>CD34<sup>+</sup>CD62L<sup>lo</sup> and CD8<sup>+</sup>CD34<sup>+</sup>CD62L<sup>hi</sup> fractions by intracellular staining. Results are representative from one of three similar experiments. **(G)** Human TIL1383I TCR were cultured in IL2 or IL15 and analyzed for extracellular acidification rate using seahorse XF24 analyzer. Experiments were repeated thrice with similar results. \*\*  $p < 0.005$ , \*  $p < 0.05$ .

**Figure S3**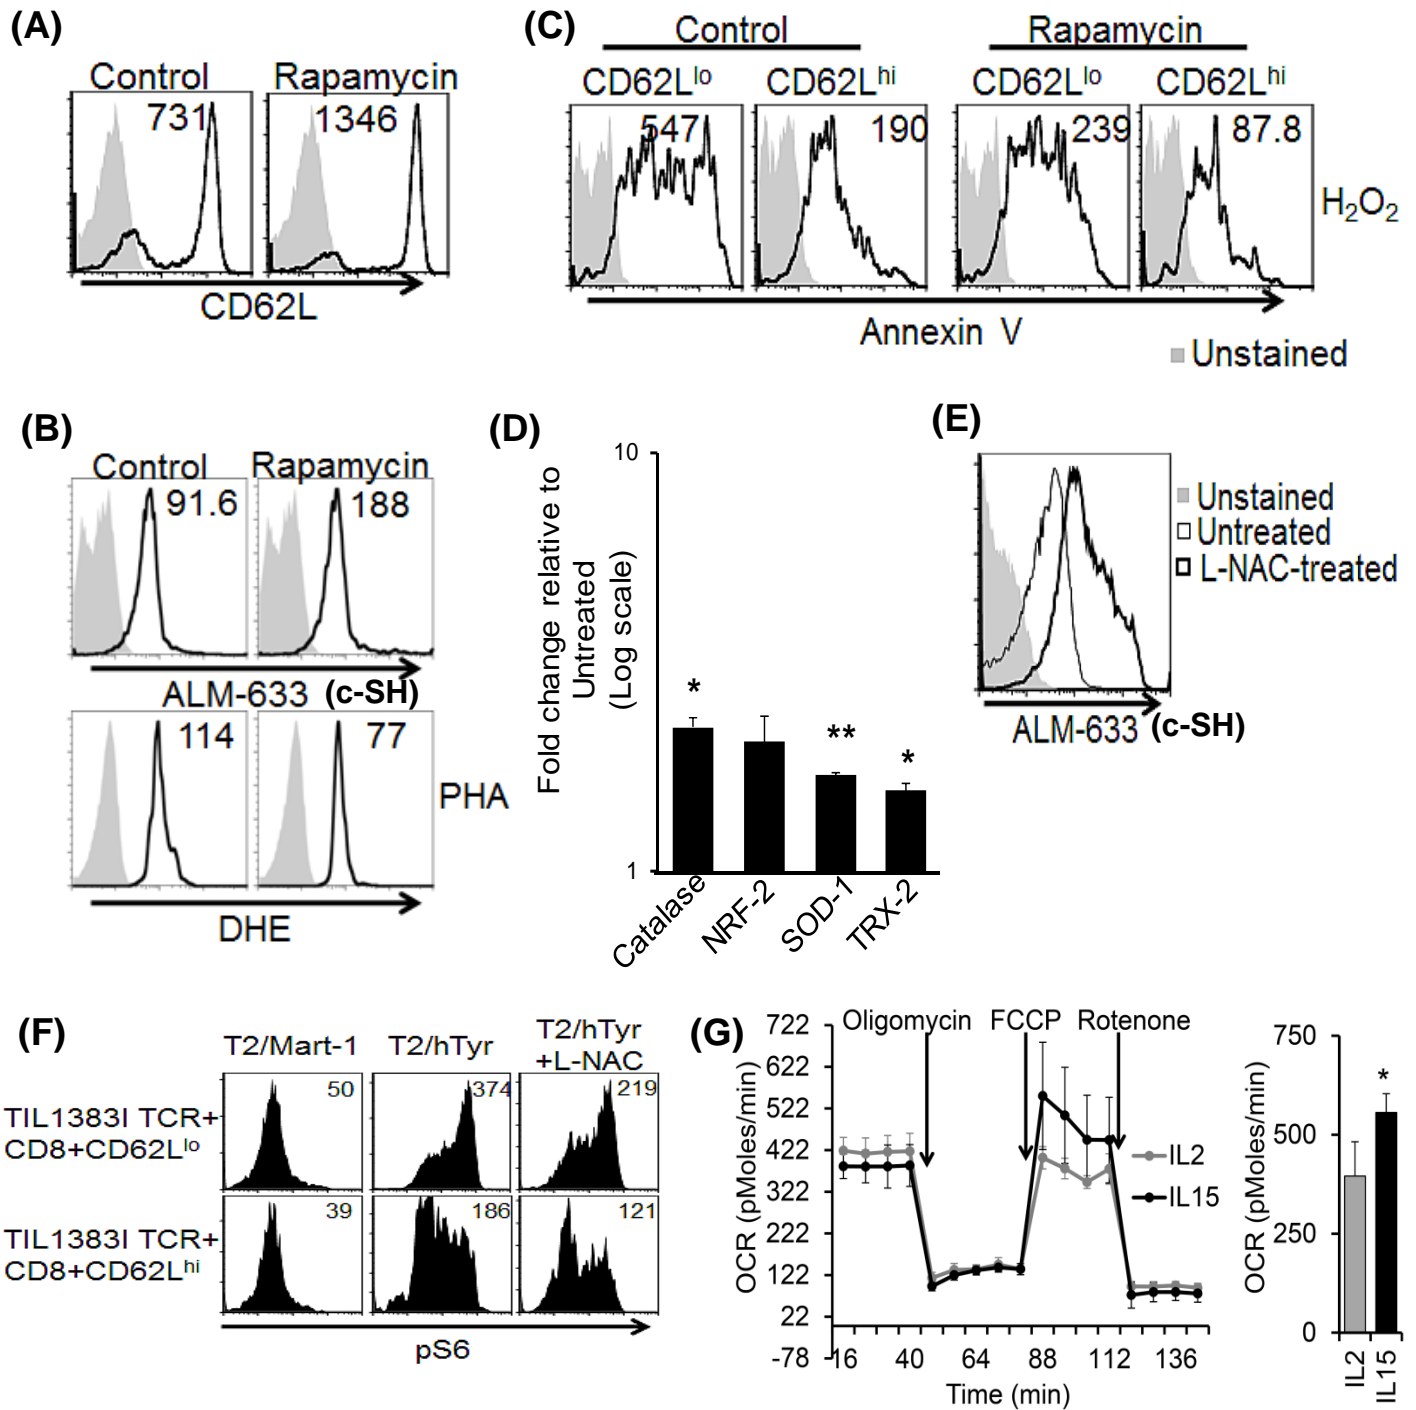**Figure S3**
