# Supplementary material
Source: PubMed Central journal article supplement (PMC4216764)
Supplement: NIHMS624932-supplement-5.pdf [file NIHMS624932-supplement-5.pdf]

**Figure S4. Schematic presentation summarizing anti-tumor potential of c-SH<sup>hi</sup> cells.** c-SH<sup>hi</sup> T cells have better capacity to persist in a tumor microenvironment, as they retain a higher antioxidant capacity, lower glycolysis, lower mitochondrial membrane potential, and lower susceptibility to AICD. On other hand, c-SH<sup>lo</sup> cells have lower antioxidant capacity, higher glycolysis and higher AICD, which may result in lower persistence and compromise the ability to control tumors.

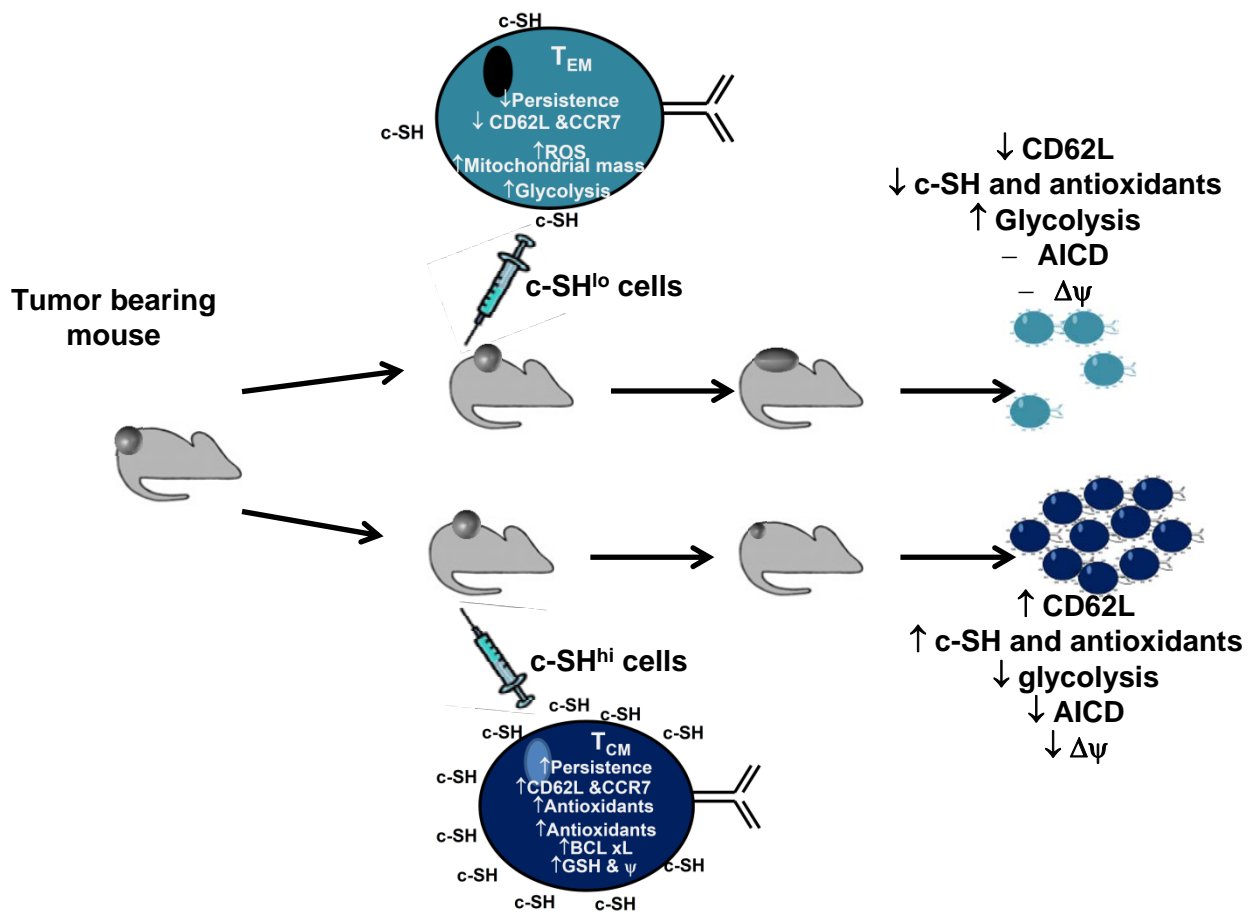

**Figure S4**
